1 [mBio \(Research Article\)](#)

2

3 **Movements of *Mycoplasma mobile* gliding machinery detected by**  
4 **high-speed atomic force microscopy**

5 Kohei Kobayashi<sup>a\*</sup>, Noriyuki Kodera<sup>b\*</sup>, Taishi Kasai<sup>a</sup>, Yuhei O Tahara<sup>a,c</sup>, Takuma  
6 Toyonaga<sup>a</sup>, Masaki Mizutani<sup>a</sup>, Ikuko Fujiwara<sup>a</sup>, Toshio Ando<sup>b</sup>, Makoto Miyata<sup>a,c,#</sup>

7

8 <sup>a</sup>Graduate School of Science, Osaka City University, 3-3-138 Sugimoto,  
9 Sumiyoshi-ku, Osaka 558-8585, Japan.

10 <sup>b</sup>Nano Life Science Institute (WPI-NanoLSI), Kanazawa University, Kakuma-chou,  
11 Kanazawa, Ishikawa 920-1192, Japan.

12 <sup>c</sup>The OCU Advanced Research Institute for Natural Science and Technology  
13 (OCARINA), Osaka City University, 3-3-138 Sugimoto, Sumiyoshi-ku, Osaka  
14 558-8585, Japan.

15

16 Address correspondence to Makoto Miyata, [miyata@sci.osaka-cu.ac.jp](mailto:miyata@sci.osaka-cu.ac.jp)

17 \*These authors contributed equally to this work.

18 Present address: Taishi Kasai: Department of Life Science, Rikkyo University,  
19 3-34-1 Nishiikebukuro, Toshima-ku, Tokyo 171-8501, Japan.

20 Masaki Mizutani: Bioproduction Research Institute, National Institute of Advanced  
21 Industrial Science and Technology (AIST), 1-1-1 Higashi, Tsukuba, Ibaraki  
22 305-8566, Japan.  
23  
24 Running title: Gliding mechanism of *Mycoplasma mobile*  
25 Keywords: AFM, probing, pathogenic bacteria, ATPase, class *Mollicutes*

26 **ABSTRACT**

27 *Mycoplasma mobile*, a parasitic bacterium, glides on solid surfaces, such as animal  
28 cells and glass by a special mechanism. This process is driven by the force  
29 generated through ATP hydrolysis on an internal structure. However, the spatial and  
30 temporal behaviors of the internal structures in living cells are unclear. In this study,  
31 we detected the movements of the internal structure by scanning cells immobilized  
32 on a glass substrate using high-speed atomic force microscopy (HS-AFM). By  
33 scanning the surface of a cell, we succeeded in visualizing particles, 2 nm in height  
34 and aligned mostly along the cell axis with a pitch of 31.5 nm, consistent with  
35 previously reported features based on electron microscopy. Movements of  
36 individual particles were then analyzed by HS-AFM. In the presence of sodium  
37 azide, the average speed of particle movements was reduced, suggesting that  
38 movement is linked to ATP hydrolysis. Partial inhibition of the reaction by sodium  
39 azide enabled us to analyze particle behavior in detail, showing that the particles  
40 move 9 nm right, relative to the gliding direction, and 2 nm into the cell interior in  
41 330 ms, then return to their original position, based on ATP hydrolysis.

42 **IMPORTANCE**

43 The *Mycoplasma* genus contains bacteria generally parasitic to animals and plants.  
44 Some *Mycoplasma* species form a protrusion at a pole, bind to solid surfaces, and  
45 glide by a special mechanism linked to their infection and survival. The special  
46 machinery for gliding can be divided into surface and internal structures that have  
47 evolved from rotary motors represented by ATP synthases. This study succeeded in

48 visualizing the real-time movements of the internal structure by scanning from the  
49 outside of the cell using an innovative high-speed atomic force microscope, and  
50 then analyzing their behaviors.

51

## 52 INTRODUCTION

53 Many bacteria translocate to nutrient-rich places and escape from repellent  
54 substances by manipulating external appendages, such as flagella and pili (1, 2).  
55 However, class *Mollicutes*, a small group of bacteria, have as many as three of their  
56 own motility mechanisms. Class Mollicutes evolved from phylum *Firmicutes* by  
57 losing peptidoglycan synthesis and flagella swimming to evade host innate  
58 immunity in their parasitic life (1). Among *Mollicutes*, the gliding motility of  
59 *Mycoplasma mobile*, the subject in this study, is suggested to have evolved from a  
60 combination of ATP synthase and cell adhesion (1, 3-8).

61 *M. mobile*, isolated from a freshwater fish, is a flask-shaped bacterium with a  
62 length of 0.8  $\mu\text{m}$  (Fig. 1A). *M. mobile* glides in the direction of tapered end on solid  
63 surfaces, such as animal cells, glass, and plastics. Its gliding speed is 2.5–4  $\mu\text{m/s}$ ,  
64 which is 3–7 times its own cell length (6, 9). The gliding machinery is divided into  
65 surface and internal structures, both of which are composed of 450 units (Fig. 1A) (3,  
66 4, 6, 10). The internal structure is characterized by multiple chains. An *M. mobile*  
67 cell has approximately 28 chains around the base of protrusion (Fig. 1A). Each  
68 chain consists of uniformly-sized particles, which are 13 nm in width and 21 nm in  
69 length (4). Interestingly, the amino acid sequence of component proteins suggests  
70 that this chain structure has evolved from ATP synthase (3, 4, 6, 8, 11). Recently,  
71 the isolated internal structure was shown to hydrolyze ATP through conformational  
72 changes, suggesting that the internal structure functions as a motor and generates  
73 the force for gliding (4, 6). The surface structure is composed of three large proteins,

74 Gli349, Gli521, and Gli123. Gli349 has a binding site for sialylated oligosaccharide  
75 at its tip and plays the role of a “leg” in gliding (5, 12-16). Gli521 and Gli123 have  
76 been proposed to act as a “crank” that transmits force (17-20) and as a “mount” to  
77 correctly localize the surface proteins (15). A working model for the gliding  
78 mechanism has been suggested as follows (4, 6, 9, 21): the force for gliding  
79 generated based on ATP-derived energy by the special motor is transmitted across  
80 the membrane to the surface structure, including the leg structure. Then, the foot  
81 (the tip structure of the leg) repeatedly catches, pulls, and releases the sialylated  
82 oligosaccharides (5, 12), the major structures on host animal surfaces (22-24),  
83 resulting in cell migration (17, 25-28). This explains the gliding mechanism at the  
84 bacterial surface; however, the spatial and temporal behaviors and movements of  
85 internal motors in living cells have not been examined.

86 High-speed atomic force microscopy (HS-AFM) is a powerful method to monitor  
87 the structure and behavior of proteins at the sub-molecular level (29). In this method,  
88 a sample placed on a substrate is scanned with a probe and visualized as height  
89 information. By performing this process at high speed (~20 frames per second (fps)),  
90 the dynamic behavior of samples can be captured while maintaining their active  
91 state in aqueous solution. In recent years, this approach has been dramatically  
92 improved, and the functional mechanism of more and more proteins has been  
93 elucidated *in vitro* through conformational changes (29-33). In addition, HS-AFM  
94 has been applied to understand the structures on the cell wall (32) or below the cell  
95 membrane (34).

96 In this study, we succeeded in visualizing the internal structure of *M. mobile*  
97 gliding machinery by scanning the surface of cells immobilized on a glass substrate  
98 using HS-AFM. The particle structure, a component of the internal structure,  
99 showed movements mainly in the right and inward directions relative to the gliding  
100 direction of an *M. mobile* cell.

101

## 102 **Results**

103 **Immobilization of living cells on the glass surface.** We attempted to  
104 visualize the gliding machinery by scanning the upper side of living cells  
105 immobilized on the substrate surface (Fig. 1B), since the gliding machinery is  
106 arranged around the base of the protruded region (Fig. 1A). Cell suspension in a  
107 buffer was placed on a glass substrate reactivated for amino groups and kept for 10  
108 min at 25–28°C. Phase-contrast microscopy showed that the cells adhered to the  
109 glass substrate at a density of one cell per approximately 6  $\mu\text{m}^2$  (Fig. 1C). When the  
110 buffer was replaced by growth medium containing sialylated oligosaccharides  
111 (scaffolds for gliding), half of the cells recovered to glide, suggesting that the cells  
112 were alive on the glass. Serum included in the medium contained sialylated  
113 oligosaccharides conjugated to fetuin, a serum protein. Fetuin was likely adsorbed  
114 onto the glass and worked as a scaffold for mycoplasma gliding (22-24, 35).

115 To observe the shape of immobilized cells, we adopted quick-freeze, deep-etch  
116 electron microscopy that visualizes cells under aqueous conditions with nanometer

117 spatial resolution (36, 37). The morphology of immobilized cells (Fig. 1D, left) was  
118 not significantly different from that of the gliding cell visualized without any chemical  
119 fixation (Fig. 1D right).

120 **Visualization of immobilized cells by HS-AFM.** Next, the cells immobilized on  
121 the glass surface were scanned by HS-AFM (Movie S1 and Fig. 2A). A typical *M.*  
122 *mobile* cell with a flask shape was found at a density of a single cell per  
123 approximately  $100 \mu\text{m}^2$ . As can be seen by comparing cell appearance in optical  
124 and electron microscopy, the cell images obtained here suggest that cells are  
125 characterized by rigidity in the front region (Fig. 1C, D), consistent with previous  
126 observations showing an internal rigid “bell” structure (4, 8). The average size of a  
127 cell was  $0.93 \pm 0.33 \mu\text{m}$  in length and  $0.33 \pm 0.08 \mu\text{m}$  in width ( $n = 20$ , Fig. 2A). We  
128 also measured the height along the long axis of the cell. Two peaks were found: one  
129 was near the front end and the other was near the tail end of the cell, consistent with  
130 previously reported characteristics of *M. mobile* cells (38, 39).

131 To visualize the gliding machinery, the cell surface was scanned by HS-AFM at  
132 a scanning rate of 300 ms per frame in an area of  $300 \text{ nm}^2$ . Interestingly, we found  
133 particle structures aligned mostly along the cell axis at the front side of the cells (Fig.  
134 2B). The particle structures appeared when the average tapping force exceeded  
135  $\sim 40 \text{ pN}$  (see Method). They were aligned at an angle of approximately  $4.6^\circ$  relative  
136 to the cell axis (Fig. 2C and D,  $n = 99$  chains from 20 cells). The particle height was  
137 approximately 2 nm (Fig. 2E), and the pitches were distributed as  $31.5 \pm 4.9 \text{ nm}$  (Fig.  
138 2F,  $n = 98$ ) in good agreement with a previous number, 31 nm, measured by



139 electron cryotomography (Fig. 2G)(4). To measure the dimensions of the particles in  
140 detail, we collected 19 particle images and averaged them (Fig. 2H). The averaged  
141 image showed an elliptical structure, 27.2 nm long and 14.2 nm wide, with two  
142 height peaks. The distance between the two peaks of a particle was 10.0 nm. These  
143 features were consistent with the results from electron cryotomography (Fig. 2I) (4),  
144 showing that the particle structure observed in HS-AFM is identical to the internal  
145 structure observed by electron cryotomography.

146 **The internal structure of *M. mobile* is detected by HS-AFM from the**  
147 **surface.** An *M. mobile* cell has huge proteins on its surface (Fig. 1A, left). To  
148 confirm that the particle structures visualized with HS-AFM are not the surface  
149 structures, the cell surface was treated with proteinase K, a serine protease with  
150 broad specificity, and scanned by HS-AFM. First, we confirmed that *M. mobile* cells  
151 gliding on the glass surface were stopped 1 min after the addition of 0.2 mg/mL  
152 proteinase K (Fig. S1A), suggesting that the surface proteins involved in the gliding  
153 machinery are sensitive to proteinase K. Then, we observed the cell surface by  
154 HS-AFM after the immobilized cells were treated with proteinase K for 20 min. The  
155 particle structures were observed on the surface of the cell even after proteinase K  
156 treatment. The particle pitches of cells with and without proteinase K treatment were  
157  $31.2 \pm 3.2$  (n = 31) and  $28.9 \pm 3.6$  nm (n = 33), respectively (Fig. S1B), showing a  
158 significant difference between them ( $p = 0.00651$  by Student's *t*-test). Based on  
159 these observations, we concluded that the particle structure detected by HS-AFM  
160 was inside the structure, but influenced by the surface treatment with proteinase K,  
161 consistent with a previous observation (8).

162 During the observation of intact cells immobilized on glass surfaces, we  
163 observed the removal of the cell membrane by chance, resulting in the exposure of  
164 the inside structure. The exposed inside structure showed features similar to the

165 internal jellyfish-like structure of *M. mobile* (4, 8) (Movie S2, Fig. S1C). We  
166 compared the features of particle structures before and after the removal of the cell  
167 membrane (Fig. S1D). After removal, the height of the particle relative to the  
168 background increased, resulting in a clearer appearance than before removal. The  
169 particle pitches were  $30.3 \pm 4.1$  and  $31.8 \pm 7.3$  nm before and after removal,  
170 respectively, without a statistically significant difference ( $p = 0.277$  by Student's  
171 *t*-test). The average heights of particles observed before and after removal of the  
172 cell membrane were 257 and 56 nm, respectively, from the lowest position of the  
173 image. The difference between them was 201 nm, comparable to the height of *M.*  
174 *mobile* cells (Fig. 2A and Fig. S1D). Therefore, the particles detected before and  
175 after cell membrane removal were proposed to be the structure beneath the upper  
176 cell membrane and the one on the lower cell membrane facing the glass substrate,  
177 respectively. As we could not remove the cell membrane intentionally, we focused  
178 on analyzing the internal structure beneath the upper cell membrane.

179 **Behavior of particle structure detected by HS-AFM.** The surface of  
180 protrusion of *M. mobile* cell was scanned with a scanning rate of 200 or 330 ms per  
181 frame with a scan area of  $200 \times 200$  nm<sup>2</sup>. Projected images were processed using a  
182 bandpass filter to improve the image contrast by drift correction and by averaging  
183 three sequential images for better signal/noise ratio (Movie S4). In most cases, the  
184 particles were difficult to trace over time because of image discontinuity, even when  
185 particle images were clear. This is probably due to the stability of the cell  
186 immobilized onto the glass surface and damage to the scanning probe. However,

187 we succeeded in tracing the behaviors of individual particles in some videos and  
188 used them for further analyses.

189 **Sodium azide suppressed particle movement.** To discuss the behaviors of  
190 internal particles, we needed to confirm that the particle movements are caused by  
191 ATP hydrolysis on the internal structure. In a previous study, the ATPase activity of  
192 the internal structure of *M. mobile* was inhibited by sodium azide (4). The binding  
193 activity and gliding speed of “gliding heads”, the gliding machinery isolated from the  
194 cell protrusion, were also inhibited by sodium azide (4). In the present study, we  
195 examined the effect of sodium azide on the gliding speed of intact *M. mobile* cells.  
196 The averaged gliding speed of intact *M. mobile* cells was decreased from  $0.77 \pm$   
197  $0.17$  to  $0.04 \pm 0.02$   $\mu\text{m/s}$  by the addition of 15.4 mM sodium azide (Fig. 3A, B),  
198 suggesting that sodium azide affected the ATPase activity of the internal structure  
199 and the force generation for gliding.

200 We then scanned the cell surfaces by HS-AFM in the presence and absence of  
201 sodium azide (Movie S4-7). The tracking of the mass center every 200 ms (no  
202 azide) or 330 ms (with azide) for 16.2 s showed that most particles were moving  
203 independently (Fig. 3C). These movements were significantly reduced by the  
204 addition of sodium azide. We calculated the accumulated moving distances and  
205 estimated the speeds for the particle movements from a linear fitting of the  
206 accumulated moving distance (Fig. 3D, E). At concentrations of 0, 15.4, 76.5, 765  
207 mM sodium azide, the speeds calculated from accumulated moving distances were  
208  $6.9 \pm 1.4$ ,  $3.9 \pm 1.4$ ,  $3.6 \pm 0.8$ , and  $3.0 \pm 1.1$  nm/s, respectively, suggesting that the

209 movement of particle structures is linked to ATP hydrolysis. Interestingly, in 15.4 mM  
210 sodium azide, the particles can be classified as either active or static, and the  
211 different types tend to form an adjacent pair in chains (Fig. 3C).

212 **Particle displacements traced as an image profile.** Not all particles moved in  
213 the same direction at the same time (Fig. 3C-E), and this feature was more obvious  
214 in 15.4 mM sodium azide (Movie S5, Fig. 4A), indicating that the movements were  
215 linked to ATP hydrolysis, not caused by artificial drift in the measurements. The  
216 addition of sodium azide may allow easier detection of individual movements by  
217 reducing some of the movements. Analysis of 27 particles in a  $200 \times 200 \text{ nm}^2$  field  
218 in the presence of 15.4 mM sodium azide for 23.1 s showed that 19 particles moved  
219 distances longer than 6 nm, distinct from other movements. The frequency of such  
220 long movements in the whole field was 1.17 events/s (Fig. 4A). Next, we focused on  
221 particle movements. Since the particles appeared to move mainly perpendicular to  
222 the particle chain in the cell surface plane, the height profile of a box perpendicular  
223 to the particle chain was traced over time (Fig. 4B). Six particles did not move (static  
224 particle), while the active particles showed remarkable movements, and a returning  
225 path for some particles was observed. As shown in “a” panel of Fig. 4B and C, the  
226 movements of the particles showed tendency moving  $9.1 \pm 2.5 \text{ nm}$  ( $n = 15$ ) in the  
227 left direction perpendicular to the chain axis and  $2.3 \pm 3.0 \text{ nm}$  ( $n = 8$ ) on the  
228 cytoplasmic side in the Z direction. The profile continued to change for  
229 approximately five frames of 330 ms. However, the movement was likely completed  
230 in a single 330-ms frame, because the image was profiled after averaging three

231 consecutive video images every 330 ms to reduce image noise. Eleven particles  
232 showed returning movements in the video, with similar speeds to their advancing  
233 movements, as shown in panels marked “r” in Fig. 4B and C.

234 Next, particle movements perpendicular to the cell axis were searched in the  
235 absence of sodium azide. Observation of 21 particles for 16.6 s showed that  
236 movements longer than 6 nm appeared at a frequency of 2.17 events/s (Movie S4  
237 and Fig. 4D). The distance moved was  $8.0 \pm 1.9$  nm ( $n = 24$ ) in the left direction  
238 perpendicular to the axis of the chain alignment within 200 ms and  $2.0 \pm 1.9$  nm ( $n =$   
239 18) on the cytoplasmic side in the Z direction (Fig. 4D).

240 **Particle displacements traced as a positional distribution.** To study the  
241 direction of movements of the particles on the membrane surface statistically, the  
242 distributions of the particles as the mass center were analyzed every 200 and 330  
243 ms for observations in the absence and presence of sodium azide, respectively (Fig.  
244 5A and Movies S5-7). The faster-scan speed for the observation in the absence of  
245 sodium azide was applied, as we assumed that the particles moved faster in this  
246 condition. However, this difference in the scanning speed should not affect the  
247 conclusion, because no difference was found, even when the analysis was  
248 performed using 400 ms intervals for the measurements without sodium azide (Fig.  
249 S2). Analysis showed that the distributions were larger in the presence of 15.4 mM  
250 and smaller at 76.5 and 765 mM than in the absence of sodium azide (Fig. 5A).  
251 Next, we measured the distributions of three distances (Fig. 5B): the particle  
252 position to the chain axis (Fig. 5C), the distance to the adjacent particle (Fig. 5D),

253 and the distance to the adjacent particle projected to the chain axis (Fig. 5E). These  
254 results are schematically summarized (Fig. 5B), suggesting that movements  
255 perpendicular to the chain axis of the particles (presented as movement “c” in Fig.  
256 5) should be present but not easy to detect in the absence of sodium azide; they  
257 were observed more clearly when the frequency of movements was reduced by  
258 sodium azide, and they were inhibited under high concentrations of sodium azide.

259

## 260 **Discussion**

261 **Internal structure was traced from the outside surface.** The particle features  
262 traced by HS-AFM in this study were consistent with those of the internal structure  
263 reported in previous studies (Fig. 2) (4, 8), suggesting that HS-AFM visualized the  
264 internal structure. The large surface proteins Gli521, Gli349, and Gli123 exist on the  
265 cell surface of *M. mobile* as components of the gliding machinery (10, 13-16, 18, 20,  
266 39, 40). A group of surface proteins, Mvsps, which are responsible for antigenic  
267 variations, also exist on the cell surface (41, 42). These surface proteins may  
268 interfere with probing the internal structure from the surface. However, the chain  
269 structures observed by HS-AFM did not show significant differences before and  
270 after protease treatment of the cells (Fig. S1 B). Furthermore, similar structures  
271 were observed before and after mechanical removal of the cell membrane (Fig. S1C,  
272 D). These results showed that the particles traced by HS-AFM were not on the  
273 surface structure, but inside the cell. The surface structure, composed of mainly

274 large filamentous proteins, may be too thin and/or mobile to be detected by the  
275 current scanning performance of HS-AFM on the cell membrane (12-14, 18). The  
276 lack of a peptidoglycan layer should be advantageous for visualizing the inside  
277 structure, due to the lack of stiffness (36-38). Moreover, the internal structure should  
278 be sufficiently stiff and positioned beneath the cell membrane, reminiscent of  
279 cortical actin in animal cells (34).

280 **Effects of sodium azide.** Sodium azide inhibits many ATPases by blocking  
281 ADP release (43). In *M. mobile* gliding, the reagent inhibited cell gliding (Fig. 3A, B)  
282 and the isolated gliding machinery (4). Particle behaviors became more visible in  
283 the presence of 15.4 mM sodium azide. Under this condition, cell gliding was  
284 reduced to 20 times slower than the original, suggesting that ATP hydrolysis  
285 occurred 20 times less frequently. If the particles move in a rapid and independent  
286 manner, it may be difficult to trace the movements of individual particles. However, if  
287 the reaction was partially inhibited by 15.4 mM sodium azide, most particles may be  
288 in their home position, while some particles move to another position. In this case,  
289 the movements could be traced easily. This assumption is supported by the  
290 observation that the particle distances between neighboring particles are 1.7–2.5  
291 nm shorter under high concentrations of sodium azide than those without the  
292 reagent (Fig. 5D). A previous study based on electron microscopy showed that the  
293 particle distances in the ADP and unbound forms were approximately 2 nm shorter  
294 than those in the AMPPNP, ADP- $V_i$ , and ADP-AIF<sub>x</sub> states (4). As sodium azide is  
295 thought to inhibit the release of ADP (43), the changes in particle distance observed

296 in the present study are consistent with the results of electron microscopy (Fig.  
297 5B)(4).

298 **Particle behavior in the gliding mechanism.** The particles moved  
299 approximately 9 nm to the right of the gliding direction and 2 nm to the cytoplasmic  
300 side within 330 ms (Fig. 6). This movement may be coupled with the transition from  
301 ADP or unbound form to ATP or the ADP/P<sub>i</sub> form (4). Considering the fact that the  
302 particles are structurally linked to the surface structures of the gliding machinery (4),  
303 the movements observed in the present study are likely involved in the gliding  
304 mechanism.

305 Previous studies have reported that the step size of *M. mobile* is approximately  
306 70 nm under no load and adjustable to various loads (17, 25, 28, 44). The surface  
307 structure contains two large proteins with dimensions comparable to the step size,  
308 that is, the Gli349 “leg” that catches the scaffold and the Gli521 “crank” that  
309 transmits force for gliding are 100 and 120 nm long, respectively (Fig. 1A) (12, 13,  
310 18). In the present study, we could not detect conformational changes in the internal  
311 structure with length comparable to the step size. Therefore, the movements  
312 occurring in the internal structure should be amplified through the huge protein  
313 molecules on the surface or through an unknown structure that connects the  
314 internal and surface structures (Fig. 1A, 2G). This assumption can explain the  
315 previous observation that the single leg exerts a force of 1.5 pN, a few times smaller  
316 than motor proteins (17), assuming elastic components are equipped in the huge  
317 surface complex.



318 In a previous study, *M. mobile* gliding showed a leftward directional change of  
319 about 8.5° with 1- $\mu$ m cell progress (27). This is consistent with the observation that  
320 the particle movements are pointed to the right, relative to the gliding direction (Fig.  
321 6). Otherwise, the tilting of the chain axis about 4.6° from the cell axis may cause a  
322 directional change in gliding (Fig. 2D).

323 To elucidate the mechanism of *M. mobile* gliding, we need to further visualize  
324 the behaviors and structures of the machinery in detail, including those of both  
325 internal and surface structures. The combination of electron microscopy and  
326 HS-AFM may provide better insights in the near future.

327

## 328 **Materials and Methods**

329 **Cell preparation.** A mutant strain (*gli52 1*[P476R]) of *M. mobile* 163K  
330 (ATCC43663) activated for binding (17, 19, 45) was grown in Aluotto medium at 25–  
331 28°C, as previously described (36, 39). Cultured cells were collected by  
332 centrifugation at 12,000  $\times$  *g* for 4 min at 25–28°C and suspended in  
333 phosphate-buffered saline with glucose (PBS/G) consisting of 75 mM sodium  
334 phosphate (pH 7.3), 68 mM NaCl, and 10 mM glucose (17, 22, 26, 27). This process  
335 was repeated twice, and finally the cells were resuspended in PBS/G to a 20-fold  
336 density of the original culture.

337 **Gliding analyses.** A tunnel chamber assembled as previously described (3-mm  
338 interior width, 22-mm length, 40- $\mu$ m wall thickness) was treated with Aluotto  
339 medium for 15 min at 25–28°C (17, 26), and then the medium was replaced by

340 PBS/G. The cell suspension was inserted into the tunnel chamber with video  
341 recording. PBS/G was replaced with PBS/G containing 0.2 mg/mL proteinase K  
342 (Qiagen N. V., Hilden, Germany) or various concentrations of sodium azide, as  
343 necessary.

344 **Cell immobilization on the glass surface.** A glass slide was treated with  
345 saturated KOH-ethanol solution for 15 min and washed 10 times with water. For  
346 analyses with an imaging rate of 1000 and 330 ms per frame, the glass was treated  
347 with 0.1% poly-L-lysine for 5 min. After the solution was removed, the glass was  
348 washed with water and dried. Then, the glass was treated with 0.1% glutaraldehyde  
349 for 5 min, washed with water, and covered with PBS/G. For analyses with an  
350 imaging rate of 200 ms per frame, the glass was treated with sandpaper, saturated  
351 with KOH-ethanol solution for 15 min, washed 10 times with water, and then dried.  
352 The washed glass was treated with 1000-fold diluted  
353 3-aminopropyldiethoxymethylsilane for 5 min at 25–28°C, washed, and treated with  
354 glutaraldehyde as described above. Finally, the cell suspension was placed onto the  
355 glass substrate and left for 10 min at 25–28°C.

356 **Microscopy.** To examine the immobilizing conditions using phase-contrast  
357 microscopy, the glass slide was assembled into a tunnel chamber (15). The cell  
358 suspension was loaded into the tunnel, kept for 10 min at 25–28°C, washed with  
359 PBS/G, and observed by phase-contrast microscopy IX71 (Olympus, Tokyo,  
360 Japan)(17, 23, 27). To analyze the immobilizing conditions, quick-freeze deep-etch  
361 electron microscopy, fixation, and washing were performed on the coverslip. When

362 the cells were frozen without immobilization, we followed the procedure for the  
363 electron microscopy method described previously (36, 37). Briefly, the cells on the  
364 glass were pressed against a copper block cooled with liquid helium and frozen.  
365 Then, the frozen sample was fractured and etched to expose it. Subsequently, the  
366 exposed surface was shadowed with platinum to create a replica membrane, which  
367 was observed under a JEM-1010 transmission electron microscope (JEOL, Tokyo,  
368 Japan) at 80 kV, equipped with a FastScan-F214 (T) charge-coupled device (CCD)  
369 camera (TVIPS, Gauting, Germany).

370 **Observation by HS-AFM.** Imaging was performed with a laboratory-built  
371 HS-AFM in tapping mode (46, 47). Small cantilevers (BLAC10DS-A2, Olympus),  
372 with a resonant frequency of ~0.5 MHz in water, a quality factor ( $Q_c$ ) of ~1.5 in water,  
373 and a spring constant ( $k_c$ ) of ~0.08 N/m were used. The cantilever's free oscillation  
374 amplitude ( $A_0$ ) and set-point amplitude ( $A_{sp}$ ) were set at ~2.5 nm and  $\sim 0.8 \times A_0$ ,  
375 respectively. From this condition, the average tapping force  $\langle F \rangle$  can be

376 approximated as ~40 pN using the following equation:  $\langle F \rangle = \frac{k_c}{2Q_c} \sqrt{A_0^2 - A_{sp}^2}$

377 For searching cells, the sample was scanned at an imaging rate of 1000 ms per  
378 frame in an area of  $3000 \times 3000 \text{ nm}^2$  with  $150 \times 150$  pixels. To observe the particle  
379 structure, the cell surface was scanned with an imaging rate of 330 or 200 ms per  
380 frame in an area of  $200 \times 200 \text{ nm}^2$  with  $100 \times 100$  pixels.

381 **Video analyses.** To trace particles in the XY plane, videos were processed by  
382 three methods (Movies S3-7). (i) The image contrast was improved by a bandpass  
383 filter. (ii) Image drifts were corrected by a plugin, "align slices in stack" (48),

384 equipped with ImageJ. (iii) Image noises were removed by averaging three  
385 consecutive slices. Then, each particle image was cropped, binarized, and traced  
386 for the mass center. Here, the threshold for binarization was determined  
387 independently for each particle of interest. The cell axes in Fig. 2 were determined  
388 by fitting a cell image as an ellipse. All analyses were performed with ImageJ 1.52A.  
389 Image averaging of particles was performed using EMAN, version 2.3.

390

## 391 **Acknowledgments**

392 We appreciate Yuya Sasajima at Osaka City University for helpful discussions. This  
393 work was supported by Grants-in-Aid for Scientific Research (B) and (A) (MEXT  
394 KAKENHI, Grant Numbers JP24390107, JP17H01544), JST CREST (Grant  
395 Number JPMJCR19S5), Osaka City University (OCU) Strategic Research Grant  
396 2018 for top priority research, and by a Grant-in-Aid for the Fugaku Trust for  
397 Medicinal Research to MM.

398

## 399 **Figure Legends**

400 **FIG 1. Experimental design and conditions for HS-AFM observation.** (A)  
401 Schematic illustrations of *M. mobile* gliding machinery. The gliding machinery  
402 formed as a protrusion can be divided into surface (left) and internal (right)  
403 structures. The surface structure is composed of about 450 units, including three  
404 large proteins: Gli123 (purple), Gli521 (green), and Gli349 (red), as shown in the

405 bottom. Gli349 repeatedly catches sialylated oligosaccharides fixed on the solid  
406 surface and pulls the cell forward. The internal structure can be divided into a large  
407 mass at the cell front and chain structure. The chain structure is composed of  
408 particles that have been suggested to evolve from F-type ATPase/synthase. (B)  
409 Schematic illustration of *M. mobile* cell being scanned by high-speed atomic force  
410 microscopy (HS-AFM). The surface of an immobilized cell on glass substrate (blue)  
411 is scanned by an AFM cantilever probe (grey), and the cantilever movement is  
412 monitored by a detector (green). (C) Phase-contrast image of *M. mobile* cell on  
413 coverslip. Living cells were immobilized onto a coverslip using poly-L-lysine and  
414 glutaraldehyde. (D) Quick-freeze, deep-etch EM image of *M. mobile* cells on a cover  
415 slip. The cell was immobilized on the coverslip by poly-L-lysine and glutaraldehyde  
416 (left) and allowed to glide on the coverslip coated with sialylated oligosaccharides  
417 (right). The cell axis and front are indicated by a green arrow (A, D).

418

419 **FIG 2. Chain imaging by HS-AFM.** (A) Left: Cluster of cells immobilized to glass  
420 surface (upper) and distribution of cell dimensions ( $n = 21$ )(lower). Right: Height  
421 profile along the broken line (upper) is plotted along the green arrow (lower). Cell  
422 axis and front are shown by an arrow. (B) Detailed structure of a cell. Left: Whole  
423 cell image. The cell axis and front are indicated by a green arrow. Middle: Magnified  
424 image of the boxed area of the left panel. Right: The middle panel image was  
425 processed with a bandpass filter. (C-F) Image analyses of particles. (C) Cell image  
426 featuring a representative chain structure. The cell axis and front are indicated by a

427 green arrow. (D) Distribution of chain angle relative to cell axis fitted by a Gaussian  
428 curve (n = 99 chains from 20 cells). (E) Image profile of the boxed area along the  
429 direction of blue arrow in panel C. (F) Scatter dot plot for distances between peak  
430 positions of chain profile. The average was  $31.5 \pm 4.9$  nm (n = 98). (G)  
431 Three-dimensional rendered image for 146-nm-thick slice of permeabilized cell  
432 reconstructed by electron cryotomography (4). The surface filamentous structures,  
433 cell membrane, undercoating at the front and side membranes, and internal chain  
434 are colored red, orange, yellow, and purple, respectively. (H) Averaged image of 19  
435 particle structures from HS-AFM (upper) and image profile of boxed area (lower).  
436 The profile (orange squares) was fitted by the sum (purple line) of two Gaussian  
437 curves (red and blue). Yellow triangles show peaks of the Gaussian curves. (I)  
438 Averaged images of chain structure (blue part in panel G) from electron  
439 cryotomography (upper)(4) and image profile of boxed area along the chain axis  
440 (lower). Yellow triangles show peaks of Gaussian curves. In all high-speed atomic  
441 force microscopy imaging, the surface was scanned left to right for line and lower to  
442 upper for image.

443

444 **FIG 3. Effects of sodium azide on particle displacements.** (A) Rainbow traces of  
445 gliding cells for 5 s with and without sodium azide from phase-contrast microscopy.  
446 Video frames were overlaid with different colors from red to blue. (B) Gliding speed  
447 under various concentrations of sodium azide. Speeds of 2.5-20 s were averaged  
448 for 140-223 cells. (C) HS-AFM images with continuous traces of individual particles

449 for 13.2 s. HS-AFM images were processed by bandpass filter, drift correction, and  
450 sequential averaging. Particles were traced every 200 ms for no sodium azide, and  
451 330 ms in the presence of sodium azide, as presented by the color change from red  
452 to blue. The cell axis and front are indicated by a green arrow. The surface was  
453 scanned left to right for line and lower to upper for imaging. Movies are shown as  
454 supplemental data as Movies S4, 5, 6, and 7 for imaging in 0, 15.4, 76.5, 765 mM  
455 sodium azide. (D) Time course of accumulated moving distances of individual  
456 particles under various concentrations of sodium azide. (E) Scatter dot plot of  
457 particle speed under various concentrations of sodium azide. Speeds were  
458 estimated from a linear fitting of accumulated moving distance.

459

460 **FIG 4. Movements of individual particles.** (A) Video frames of particle chains  
461 under 15.4 mM sodium azide (Movies S5). The green arrow on the left shows the  
462 cell axis and front. The particles with remarkable movements are marked before  
463 and after the movements by differently colored triangles and arrows, respectively.  
464 Particles moved to the left relative to the gliding direction. (B) Consecutive image  
465 profile of active and static particles. Left image: Raw image of video frame showing  
466 areas profiled for active (red) and static (blue) particles. Right graphs: Image  
467 profiles of active (red background) and static (blue background) particles every 330  
468 ms for 1.98 s. (C) Consecutive image profiles showing particle movements every  
469 330 ms for 1.98 s in 15.4 mM sodium azide. (D) Consecutive image profiles  
470 showing particle movements every 200 ms for 1.2 s without sodium azide (Movies

471 S4). (B, C, D) Consecutive profiles of each frame from red to purple. Advancing (a)  
472 and returning (r) movements are presented. Peak positions of focusing particles are  
473 marked by a triangle and an arrow, respectively, for the initial and the end time  
474 points. Distances between peaks before and after movement are marked by a  
475 triangle and an arrow, respectively; these were manually measured for statistical  
476 analysis of particle movements. The profile of heights and positions is presented  
477 with a common X- Y- scale in the lower panel for each data set.

478

479 **FIG 5. Analyses of particle distribution.** (A) Distribution of particles in chain. The  
480 particle positions and the axis of the particle positions are indicated by red dots and  
481 grey dashed lines, respectively. The particle positions were detected every 200 and  
482 330 ms, respectively, without and with sodium azide at 82, 66, 70, and 66 points  
483 under 0, 15.4, 76.5, and 765 mM sodium azide, respectively. The axis of particle  
484 positions was determined by a linear approximation of the average position of each  
485 particle. (B) Schematic illustration of three distances with average and standard  
486 deviation (SD) values in nm. The particle position to the chain axis (C, purple), the  
487 distance to the adjacent particle (D, blue), and the distance to the adjacent particle  
488 projected to the chain axis (E, green) are shown. Bar lengths are not to scale.  
489 Movies S4-7 were analyzed. The chain axis is indicated by a green arrow pointing  
490 mostly to the cell front in panels (A) and (B).

491

492 **FIG 6. Schematic illustration of particle movement in *M. mobile* visualized by**



493 **HS-AFM.** The internal chain of the gliding machinery and cell membrane are  
494 indicated by blue objects and a beige plate, respectively. Here, we focus on the  
495 particle chain lining the lower side of cell membrane, while we scanned mostly the  
496 particle chain beneath the upper side of cell membrane in this study. The left and  
497 right panels show the particles before and after the advancing movement,  
498 respectively. The central particle moves as an ATP- or ADP/Pi-bound form, to the  
499 right and inner sides for a distance of 9 and 2 nm, respectively.

500

501 **FIG S1 Protease treatment and unroofing confirm that particles are**  
502 **intracellular structures.** (A) Rainbow traces of gliding cell for 5 s starting 20 s  
503 before and 60 s after the addition of 0.2 mg/ml proteinase K marked from red to  
504 purple over time. (B) Processed HS-AFM image of particle structures on a cell  
505 surface without (left) and with (middle) proteinase K treatment and scatter dot plot of  
506 distances between particles along each chain axis (right). Particle distances on cells  
507 with and without proteinase K treatment were  $30.1 \pm 6.1$  nm ( $n = 35$ ) and  $31.2 \pm 3.2$   
508 nm ( $n = 31$ ), respectively (Student's  $t$ -test:  $p = 0.328$ ). (C) Time course images of  
509 HS-AFM scanning of cell membrane removal. The cell membrane started to be  
510 broken at 2 s, and the internal structure was completely exposed at 23 s after the  
511 cell was focused ( $t = 0$ )(Movies S2). Scanning area,  $500 \times 500$  nm<sup>2</sup> with  $150 \times 150$   
512 pixels; frame rate, 1000 ms per frame. (D) Magnified HS-AFM image of particle  
513 structures before (left) and after (middle) cell membrane removal and scatter dot  
514 plot of distances between particles along each chain axis (right). The color gauge

515 on the right side of each figure shows the scale of the relative height (the height is  
516 presented by adjusting the lowest point in panel D until it becomes 0). The averaged  
517 height of the observation surface after removal of cell membrane was 201 nm lower  
518 than before removal (257 and 56 nm for before and after, respectively). The  
519 distances between neighboring particles before and after cell membrane removal  
520 were  $30.3 \pm 4.1$  (n = 36) and  $31.8 \pm 7.3$  nm (n = 40), respectively ( $p = 0.277$ ). The  
521 cell axis and front are indicated by a green arrow in panels (B-D).

522

523 **FIG S2 Particle distribution without sodium azide analyzed using different**  
524 **time intervals.** Distribution of particles in a chain (A), the particle position to the  
525 chain axis (B), the distance to the adjacent particle (C), and the distance to the  
526 adjacent particle projected to the chain axis (D) were analyzed every 200, 400, and  
527 600 ms.

528

529 **Movie S1 HS-AFM movie searching for *M. mobile* cells.** An *M. mobile* cell  
530 immobilized to the substrate surface was searched by recording at 1 fps. The video  
531 was played at a speed of 2x. The scanning field was  $3 \times 3 \mu\text{m}^2$  with  $100 \times 100$   
532 pixels. A cell appeared around 6 s and moved around the center of the field at 13 s.  
533 The cell front is directed to the lower right.

534

535 **Movie S2 HS-AFM movie showing removal of the cell membrane.** The upper  
536 membrane of a cell scanned at 3 fps was removed at approximately 20 s. The video

537 was played at 5x speed. The scanning field was  $500 \times 500 \text{ nm}^2$  with  $150 \times 150$   
538 pixels. The cell front is directed to the upper right.

539

540 **Movie S3 Effects of image processing on HS-AFM movies of the cell surface.**

541 The original movie (upper left) was processed using a bandpass filter (upper right),  
542 bandpass filter + drift correction (lower left), and bandpass filter + drift correction +  
543 sequential averaging (lower right). The video was played at 3.3x speed. The cell  
544 front was directed to the lower portion of the frame.

545

546 **Movie S4 HS-AFM movie showing particle movements.** The cell surface was  
547 scanned at 5 fps. The scanning field was  $200 \times 200 \text{ nm}^2$  with  $100 \times 100$  pixels. The  
548 video was played at 2x speed. The cell front is directed to the upper right.

549

550 **Movie S5 HS-AFM movie showing particle movements under 15.4 mM sodium**  
551 **azide.** The cell surface was scanned at 3 fps. The scanning field was  $200 \times 200$   
552  $\text{nm}^2$  with  $100 \times 100$  pixels. The video was played at 3.3x speed. The cell front was  
553 directed to the lower portion of the frame.

554

555 **Movie S6 HS-AFM movie showing particle movements under 76.5 mM sodium**  
556 **azide.** The cell surface was scanned at 3 fps. The scanning field was  $200 \times 200$   
557  $\text{nm}^2$  with  $100 \times 100$  pixels. The video was played at 3.3x speed. The cell front is  
558 directed to the upper left.

559

560 **Movie S7 HS-AFM movie showing particle movements under 765 mM sodium**

561 **azide.** The cell surface was scanned at 3 fps. The scanning field was 200 × 200

562 nm<sup>2</sup> with 100 × 100 pixels. The video was played at 3.3x speed. The cell front is

563 directed to the upper left.

564

## 565 **References**

- 566 1. **Miyata M, Robinson RC, Uyeda TQP, Fukumori Y, Fukushima SI, Haruta S,**  
567 **Homma M, Inaba K, Ito M, Kaito C, Kato K, Kenri T, Kinoshita Y, Kojima S,**  
568 **Minamino T, Mori H, Nakamura S, Nakane D, Nakayama K, Nishiyama M,**  
569 **Shibata S, Shimabukuro K, Tamakoshi M, Taoka A, Tashiro Y, Tulum I,**  
570 **Wada H, Wakabayashi KI.** 2020. Tree of motility - A proposed history of motility  
571 systems in the tree of life. *Genes Cells* **25**:6-21.
- 572 2. **Nakamura S, Minamino T.** 2019. Flagella-driven motility of bacteria.  
573 *Biomolecules* **9**: 31337100.
- 574 3. **Tulum I, Kimura K, Miyata M.** 2020. Identification and sequence analyses of  
575 the gliding machinery proteins from *Mycoplasma mobile*. *Sci Rep* **10**:3792.
- 576 4. **Nishikawa M, Nakane D, Toyonaga T, Kawamoto A, Kato T, Namba K,**  
577 **Miyata M.** 2019. Refined mechanism of *Mycoplasma mobile* gliding based on  
578 structure, ATPase activity, and sialic acid binding of machinery. *mBio*  
579 **10**:e02846-02819.
- 580 5. **Hamaguchi T, Kawakami M, Furukawa H, Miyata M.** 2019. Identification of  
581 novel protein domain for sialyloligosaccharide binding essential to *Mycoplasma*  
582 *mobile* gliding. *FEMS Microbiol Lett* **366**:fnz016.
- 583 6. **Miyata M, Hamaguchi T.** 2016. Prospects for the gliding mechanism of  
584 *Mycoplasma mobile*. *Curr Opin Microbiol* **29**:15-21.
- 585 7. **Tulum I, Yabe M, Uenoyama A, Miyata M.** 2014. Localization of P42 and  
586 F<sub>1</sub>-ATPase alpha-subunit homolog of the gliding machinery in *Mycoplasma*

- 587 *mobile* revealed by newly developed gene manipulation and fluorescent protein  
588 tagging. J Bacteriol **196**:1815-1824.
- 589 8. **Nakane D, Miyata M.** 2007. Cytoskeletal "jellyfish" structure of *Mycoplasma*  
590 *mobile*. Proc Natl Acad Sci U S A **104**:19518-19523.
- 591 9. **Miyata M.** 2010. Unique centipede mechanism of *Mycoplasma* gliding. Annu  
592 Rev Microbiol **64**:519-537.
- 593 10. **Uenoyama A, Miyata M.** 2005. Identification of a 123-kilodalton protein  
594 (Gli123) involved in machinery for gliding motility of *Mycoplasma mobile*. J  
595 Bacteriol **187**:5578-5584.
- 596 11. **Beven L, Charenton C, Dautant A, Bouyssou G, Labroussaa F, Skolleremo**  
597 **A, Persson A, Blanchard A, Sirand-Pugnet P.** 2012. Specific evolution of  
598 F<sub>1</sub>-like ATPases in mycoplasmas. PLoS One **7**:e38793.
- 599 12. **Lesoil C, Nonaka T, Sekiguchi H, Osada T, Miyata M, Afrin R, Ikai A.** 2010.  
600 Molecular shape and binding force of *Mycoplasma mobile*'s leg protein Gli349  
601 revealed by an AFM study. Biochem Biophys Res Commun **391**:1312-1317.
- 602 13. **Adan-Kubo J, Uenoyama A, Arata T, Miyata M.** 2006. Morphology of isolated  
603 Gli349, a leg protein responsible for *Mycoplasma mobile* gliding via glass  
604 binding, revealed by rotary shadowing electron microscopy. J Bacteriol  
605 **188**:2821-2828.
- 606 14. **Metsugi S, Uenoyama A, Adan-Kubo J, Miyata M, Yura K, Kono H, Go N.**  
607 2005. Sequence analysis of the gliding protein Gli349 in *Mycoplasma mobile*.  
608 Biophysics (Nagoya-shi) **1**:33-43.
- 609 15. **Uenoyama A, Kusumoto A, Miyata M.** 2004. Identification of a 349-kilodalton  
610 protein (Gli349) responsible for cytoadherence and glass binding during gliding  
611 of *Mycoplasma mobile*. J Bacteriol **186**:1537-1545.
- 612 16. **Kusumoto A, Seto S, Jaffe JD, Miyata M.** 2004. Cell surface differentiation of  
613 *Mycoplasma mobile* visualized by surface protein localization. Microbiology  
614 **150**:4001-4008.
- 615 17. **Mizutani M, Tulum I, Kinoshita Y, Nishizaka T, Miyata M.** 2018. Detailed  
616 analyses of stall force generation in *Mycoplasma mobile* gliding. Biophys J  
617 **114**:1411-1419.
- 618 18. **Nonaka T, Adan-Kubo J, Miyata M.** 2010. Triskelion structure of the Gli521  
619 protein, involved in the gliding mechanism of *Mycoplasma mobile*. J Bacteriol

- 620           **192**:636-642.
- 621   19. **Uenoyama A, Seto S, Nakane D, Miyata M.** 2009. Regions on Gli349 and  
622       Gli521 protein molecules directly involved in movements of *Mycoplasma mobile*  
623       gliding machinery, suggested by use of inhibitory antibodies and mutants. J  
624       Bacteriol **191**:1982-1985.
- 625   20. **Seto S, Uenoyama A, Miyata M.** 2005. Identification of a 521-kilodalton protein  
626       (Gli521) involved in force generation or force transmission for *Mycoplasma*  
627       *mobile* gliding. J Bacteriol **187**:3502-3510.
- 628   21. **Chen J, Neu J, Miyata M, Oster G.** 2009. Motor-substrate interactions in  
629       *Mycoplasma* motility explains non-Arrhenius temperature dependence. Biophys  
630       J **97**:2930-2938.
- 631   22. **Kasai T, Hamaguchi T, Miyata M.** 2015. Gliding motility of *Mycoplasma mobile*  
632       on uniform oligosaccharides. J Bacteriol **197**:2952-2957.
- 633   23. **Kasai T, Nakane D, Ishida H, Ando H, Kiso M, Miyata M.** 2013. Role of  
634       binding in *Mycoplasma mobile* and *Mycoplasma pneumoniae* gliding analyzed  
635       through inhibition by synthesized sialylated compounds. J Bacteriol  
636       **195**:429-435.
- 637   24. **Nagai R, Miyata M.** 2006. Gliding motility of *Mycoplasma mobile* can occur by  
638       repeated binding to *N*-acetylneuraminylactose (sialyllactose) fixed on solid  
639       surfaces. J Bacteriol **188**:6469-6475.
- 640   25. **Kinosita Y, Miyata M, Nishizaka T.** 2018. Linear motor driven-rotary motion of  
641       a membrane-permeabilized ghost in *Mycoplasma mobile*. Sci Rep **8**:11513.
- 642   26. **Tanaka A, Nakane D, Mizutani M, Nishizaka T, Miyata M.** 2016. Directed  
643       binding of gliding bacterium, *Mycoplasma mobile*, shown by detachment force  
644       and bond lifetime. mBio **7**:00455-00416.
- 645   27. **Morio H, Kasai T, Miyata M.** 2016. Gliding direction of *Mycoplasma mobile*. J  
646       Bacteriol **198**:283-290.
- 647   28. **Kinosita Y, Nakane D, Sugawa M, Masaike T, Mizutani K, Miyata M,**  
648       **Nishizaka T.** 2014. Unitary step of gliding machinery in *Mycoplasma mobile*.  
649       Proc Natl Acad Sci USA **111**:8601-8606.
- 650   29. **Ando T.** 2018. High-speed atomic force microscopy and its future prospects.  
651       Biophys Rev **10**:285-292.
- 652   30. **Kodera N, Noshiro D, Dora SK, Mori T, Habchi J, Blocquel D, Gruet A,**

- 653        **Dosnon M, Salladini E, Bignon C, Fujioka Y, Oda T, Noda NN, Sato M, Lotti**  
654        **M, Mizuguchi M, Longhi S, Ando T.** 2020. Structural and dynamics analysis of  
655        intrinsically disordered proteins by high-speed atomic force microscopy. *Nat*  
656        *Nanotechnol* doi:10.1038/s41565-020-00798-9.
- 657    31. **Kodera N, Ando T.** 2020. High-speed atomic force microscopy to study myosin  
658        motility. *Adv Exp Med Biol* **1239**:127-152.
- 659    32. **Yamashita H, Taoka A, Uchihashi T, Asano T, Ando T, Fukumori Y.** 2012.  
660        Single-molecule imaging on living bacterial cell surface by high-speed AFM. *J*  
661        *Mol Biol* **422**:300-309.
- 662    33. **Kodera N, Yamamoto D, Ishikawa R, Ando T.** 2010. Video imaging of walking  
663        myosin V by high-speed atomic force microscopy. *Nature* **468**:72-76.
- 664    34. **Zhang Y, Yoshida A, Sakai N, Uekusa Y, Kumeta M, Yoshimura SH.** 2017. In  
665        vivo dynamics of the cortical actin network revealed by fast-scanning atomic  
666        force microscopy. *Microscopy (Oxf)* **66**:272-282.
- 667    35. **Jaffe JD, Miyata M, Berg HC.** 2004. Energetics of gliding motility in  
668        *Mycoplasma mobile*. *J Bacteriol* **186**:4254-4261.
- 669    36. **Tulum I, Tahara Y, Miyata M.** 2019. Peptidoglycan layer and disruption  
670        processes in *Bacillus subtilis* cells visualized using quick-freeze, deep-etch  
671        electron microscopy. *Microscopy (Oxf)* **68**:441-449.
- 672    37. **Miyata M, Petersen JD.** 2004. Spike structure at the interface between gliding  
673        *Mycoplasma mobile* cells and glass surfaces visualized by  
674        rapid-freeze-and-fracture electron microscopy. *J Bacteriol* **186**:4382-4386.
- 675    38. **Nakane D, Miyata M.** 2012. *Mycoplasma mobile* cells elongated by detergent  
676        and their pivoting movements in gliding. *J Bacteriol* **194**:122-130.
- 677    39. **Miyata M, Yamamoto H, Shimizu T, Uenoyama A, Citti C, Rosengarten R.**  
678        2000. Gliding mutants of *Mycoplasma mobile*: relationships between motility  
679        and cell morphology, cell adhesion and microcolony formation. *Microbiology*  
680        **146**:1311-1320.
- 681    40. **Wu HN, Miyata M.** 2012. Whole surface image of *Mycoplasma mobile*,  
682        suggested by protein identification and immunofluorescence microscopy. *J*  
683        *Bacteriol* **194**:5848-5855.
- 684    41. **Wu HN, Kawaguchi C, Nakane D, Miyata M.** 2012. "Mycoplasmal antigen  
685        modulation," a novel surface variation suggested for a lipoprotein specifically

- 686 localized on *Mycoplasma mobile*. Curr Microbiol **64**:433-440.
- 687 42. **Adan-Kubo J, Yoshii SH, Kono H, Miyata M.** 2012. Molecular structure of  
688 isolated Mvspl, a variable surface protein of the fish pathogen *Mycoplasma*  
689 *mobile*. J Bacteriol **194**:3050-3057.
- 690 43. **Bowler MW, Montgomery MG, Leslie AG, Walker JE.** 2006. How azide  
691 inhibits ATP hydrolysis by the F-ATPases. Proc Natl Acad Sci U S A  
692 **103**:8646-8649.
- 693 44. **Miyata M, Ryu WS, Berg HC.** 2002. Force and velocity of *Mycoplasma mobile*  
694 gliding. J Bacteriol **184**:1827-1831.
- 695 45. **Uenoyama A, Miyata M.** 2005. Gliding ghosts of *Mycoplasma mobile*. Proc Natl  
696 Acad Sci USA **102**:12754-12758.
- 697 46. **Uchihashi T, Kodera N, Ando T.** 2012. Guide to video recording of structure  
698 dynamics and dynamic processes of proteins by high-speed atomic force  
699 microscopy. Nat Protoc **7**:1193-1206.
- 700 47. **Ando T, Kodera N, Takai E, Maruyama D, Saito K, Toda A.** 2001. A  
701 high-speed atomic force microscope for studying biological macromolecules.  
702 Proc Natl Acad Sci U S A **98**:12468-12472.
- 703 48. **Tseng Q, Duchemin-Pelletier E, Deshiere A, Balland M, Guillou H, Filhol O,**  
704 **Thery M.** 2012. Spatial organization of the extracellular matrix regulates  
705 cell-cell junction positioning. Proc Natl Acad Sci U S A **109**:1506-1511.  
706



# Figure 1

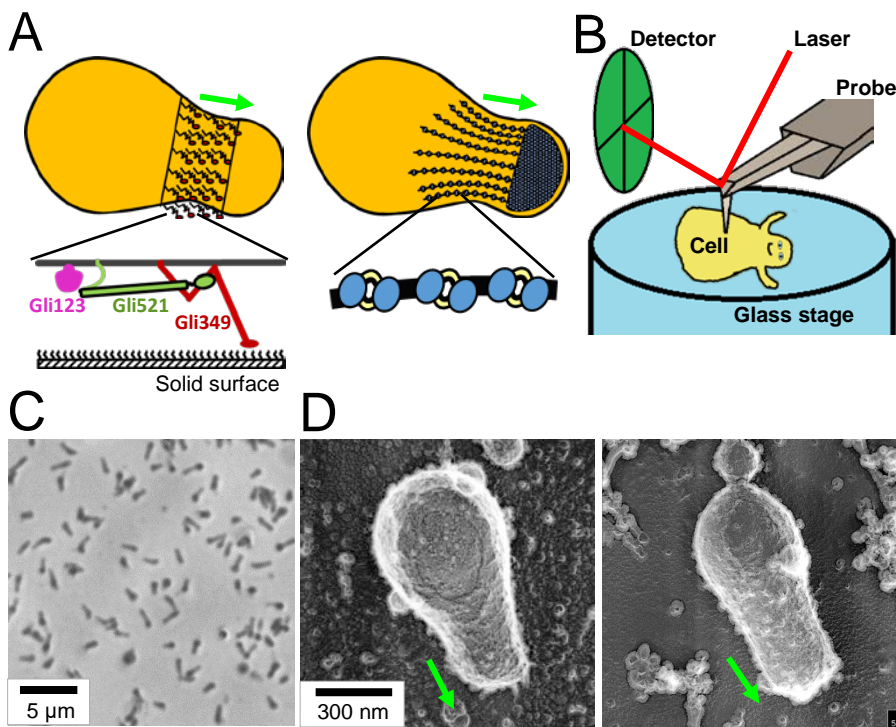

## FIG 1. Experimental design and conditions for HS-AFM observation.

(A) Schematic illustrations of *M. mobile* gliding machinery. The gliding machinery formed as a protrusion can be divided into surface (left) and internal (right) structures. The surface structure is composed of about 450 units, including three large proteins: Gli123 (purple), Gli521 (green), and Gli349 (red), as shown in the bottom. Gli349 repeatedly catches sialylated oligosaccharides fixed on the solid surface and pulls the cell forward. The internal structure can be divided into a large mass at the cell front and chain structure. The chain structure is composed of particles that have been suggested to evolve from F-type ATPase/synthase. (B) Schematic illustration of *M. mobile* cell being scanned by high-speed atomic force microscopy (HS-AFM). The surface of an immobilized cell on glass substrate (blue) is scanned by an AFM cantilever probe (grey), and the cantilever movement is monitored by a detector (green). (C) Phase-contrast image of *M. mobile* cell on coverslip. Living cells were immobilized onto a coverslip using poly-L-lysine and glutaraldehyde. (D) Quick-freeze, deep-etch EM image of *M. mobile* cells on a cover slip. The cell was immobilized on the coverslip by poly-L-lysine and glutaraldehyde (left) and allowed to glide on the coverslip coated with sialylated oligosaccharides (right). The cell axis and front are indicated by a green arrow (A, D).

## Figure 2

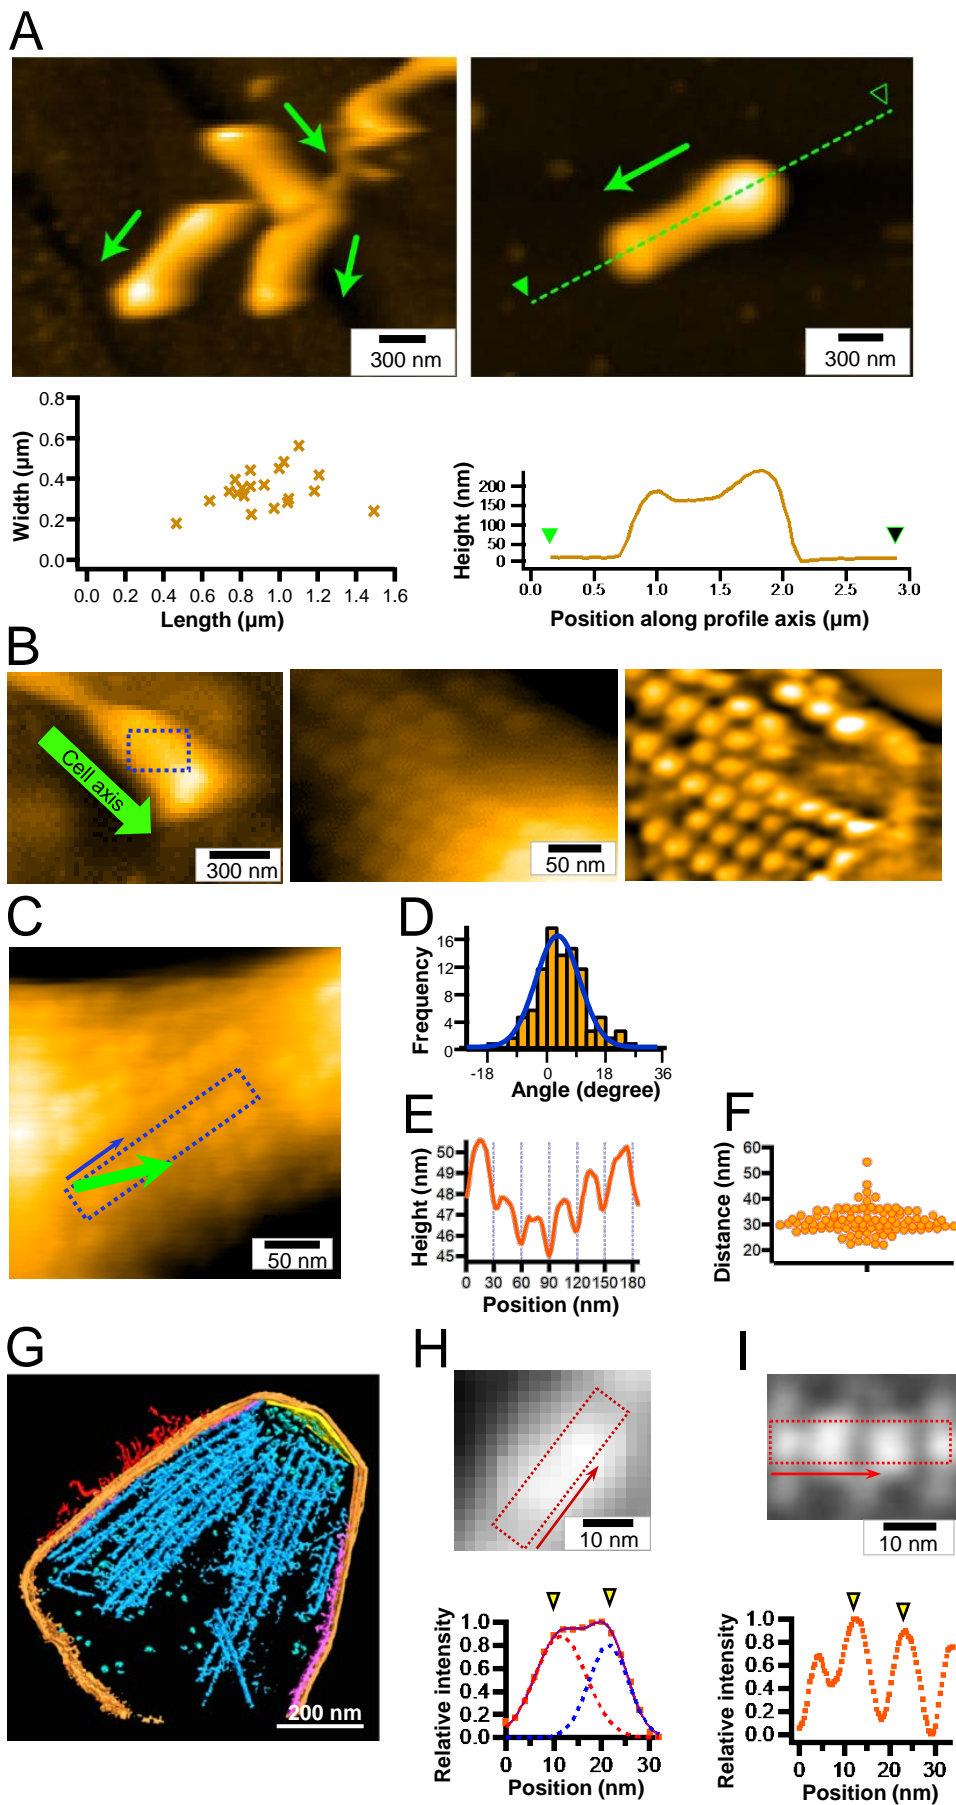

## Figure 2

**FIG 2. Chain imaging by HS-AFM.** (A) Left: Cluster of cells immobilized to glass surface (upper) and distribution of cell dimensions ( $n = 21$ )(lower). Right: Height profile along the broken line (upper) is plotted along the green arrow (lower). Cell axis and front are shown by an arrow. (B) Detailed structure of a cell. Left: Whole cell image. The cell axis and front are indicated by a green arrow. Middle: Magnified image of the boxed area of the left panel. Right: The middle panel image was processed with a bandpass filter. (C-F) Image analyses of particles. (C) Cell image featuring a representative chain structure. The cell axis and front are indicated by a green arrow. (D) Distribution of chain angle relative to cell axis fitted by a Gaussian curve ( $n = 99$  chains from 20 cells). (E) Image profile of the boxed area along the direction of blue arrow in panel C. (F) Scatter dot plot for distances between peak positions of chain profile. The average was  $31.5 \pm 4.9$  nm ( $n = 98$ ). (G) Three-dimensional rendered image for 146-nm-thick slice of permeabilized cell reconstructed by electron cryotomography (4). The surface filamentous structures, cell membrane, undercoating at the front and side membranes, and internal chain are colored red, orange, yellow, and purple, respectively. (H) Averaged image of 19 particle structures from HS-AFM (upper) and image profile of boxed area (lower). The profile (orange squares) was fitted by the sum (purple line) of two Gaussian curves (red and blue). Yellow triangles show peaks of the Gaussian curves. (I) Averaged images of chain structure (blue part in panel G) from electron cryotomography (upper)(4) and image profile of boxed area along the chain axis (lower). Yellow triangles show peaks of Gaussian curves. In all high-speed atomic force microscopy imaging, the surface was scanned left to right for line and lower to upper for image.

## Figure 3

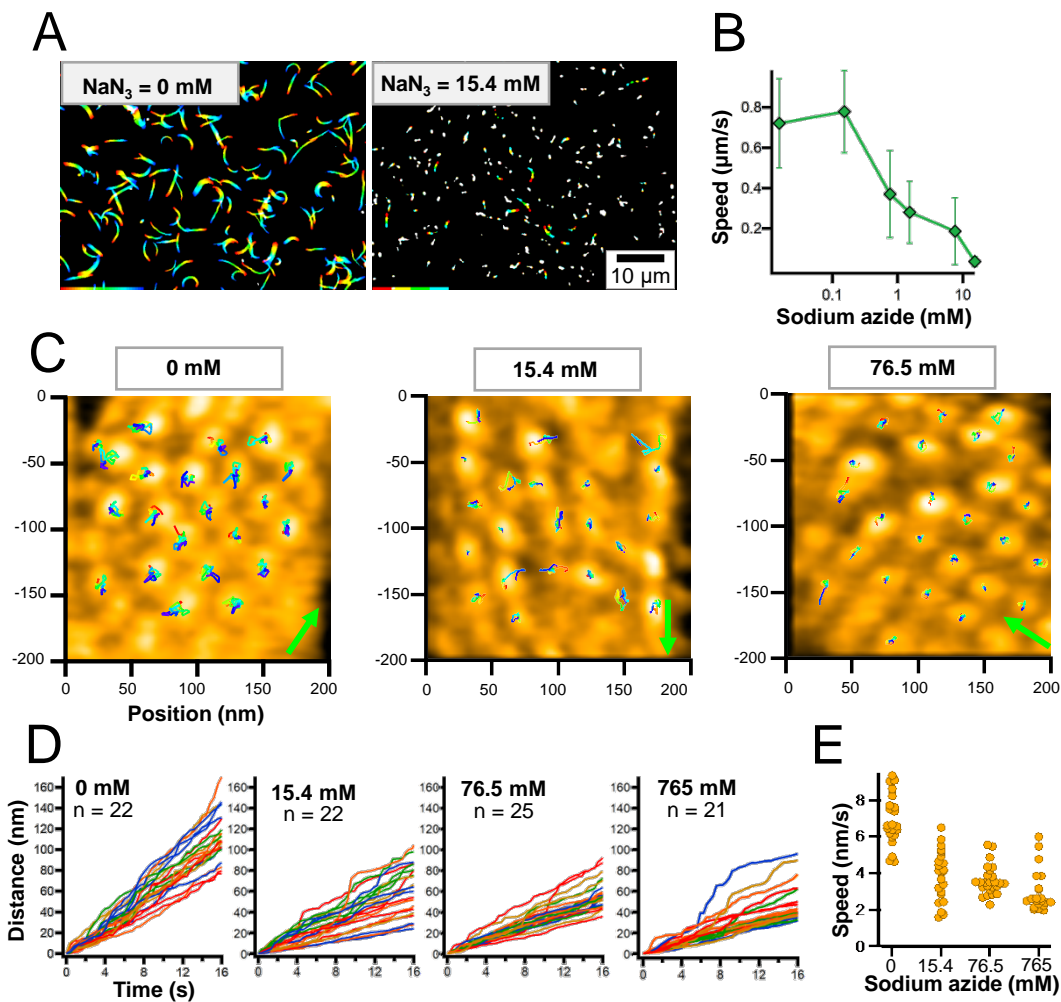

**FIG 3. Effects of sodium azide on particle displacements.** (A) Rainbow traces of gliding cells for 5 s with and without sodium azide from phase-contrast microscopy. Video frames were overlaid with different colors from red to blue. (B) Gliding speed under various concentrations of sodium azide. Speeds of 2.5-20 s were averaged for 140-223 cells. (C) HS-AFM images with continuous traces of individual particles for 13.2 s. HS-AFM images were processed by bandpass filter, drift correction, and sequential averaging. Particles were traced every 200 ms for no sodium azide, and 330 ms in the presence of sodium azide, as presented by the color change from red to blue. The cell axis and front are indicated by a green arrow. The surface was scanned left to right for line and lower to upper for imaging. Movies are shown as supplemental data as Movies S4, 5, 6, and 7 for imaging in 0, 15.4, 76.5, 765 mM sodium azide. (D) Time course of accumulated moving distances of individual particles under various concentrations of sodium azide. (E) Scatter dot plot of particle speed under various concentrations of sodium azide. Speeds were estimated from a linear fitting of accumulated moving distance.

# Figure 4

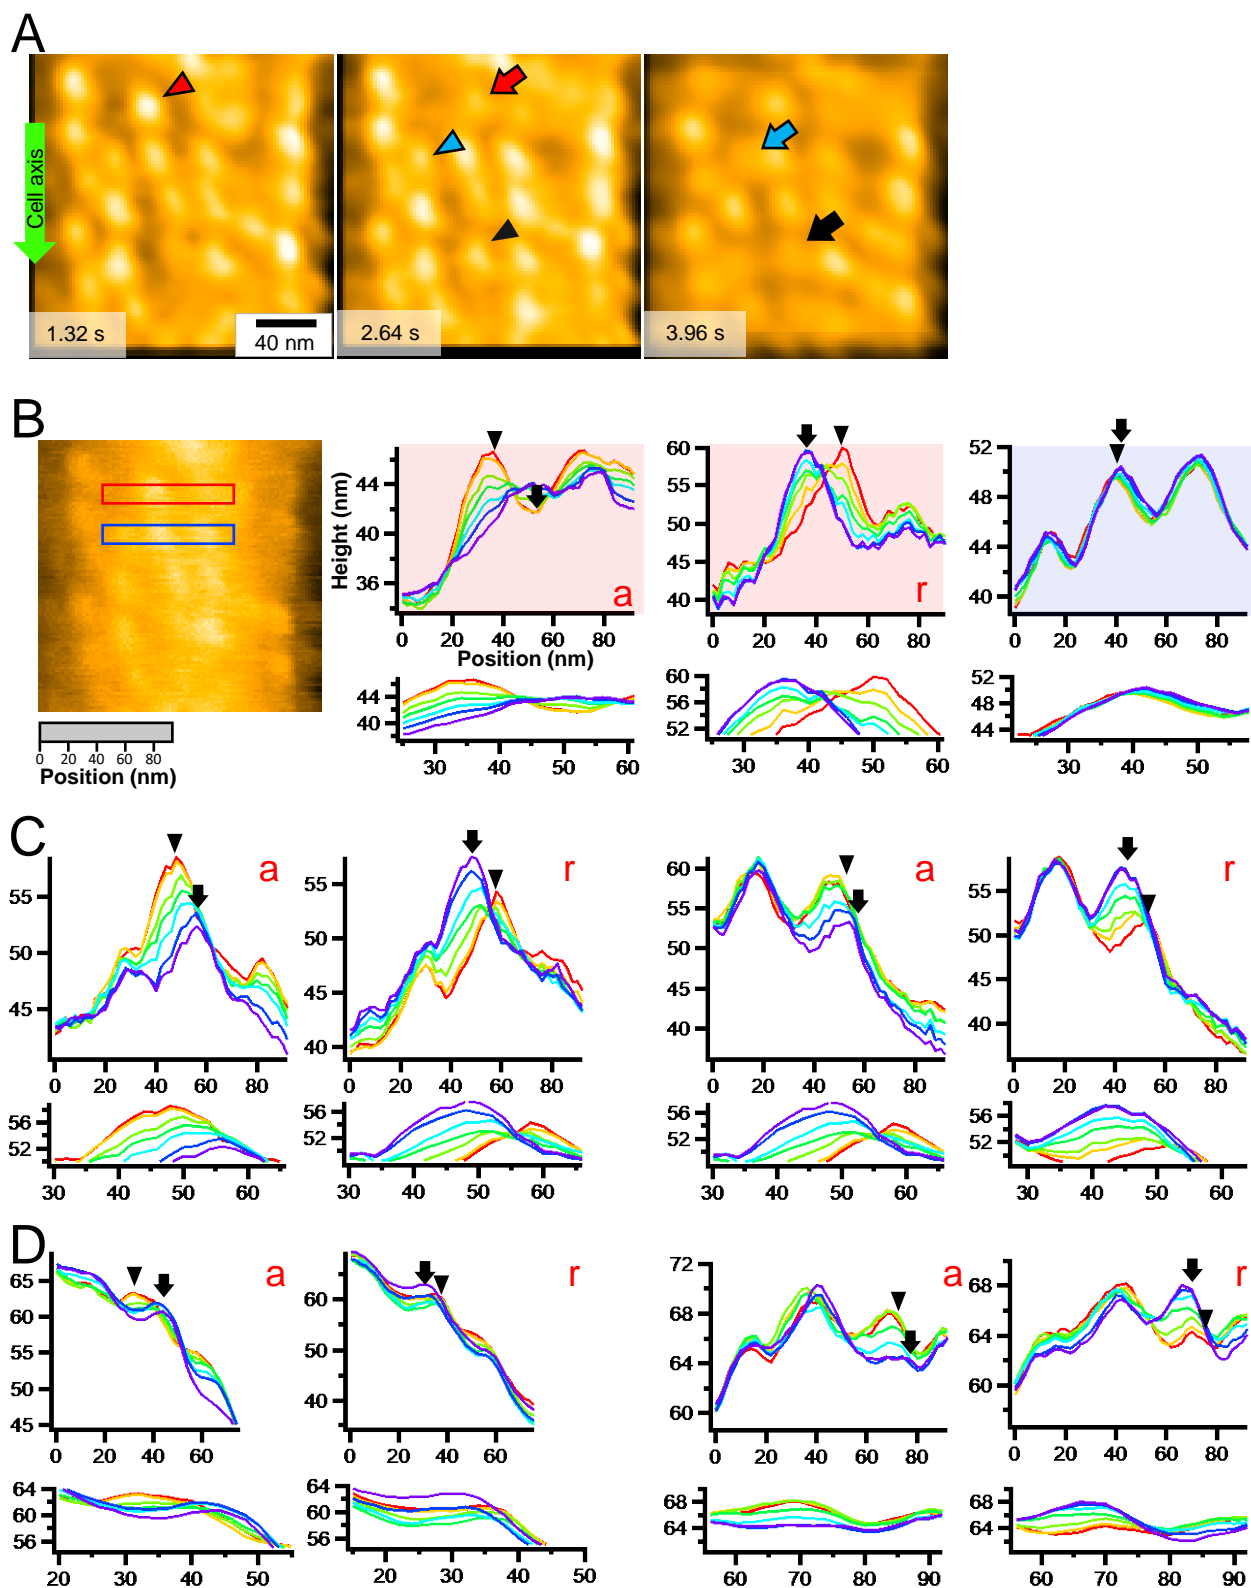

# Figure 4

**FIG 4. Movements of individual particles.** (A) Video frames of particle chains under 15.4 mM sodium azide (Movies S5). The green arrow on the left shows the cell axis and front. The particles with remarkable movements are marked before and after the movements by differently colored triangles and arrows, respectively. Particles moved to the left relative to the gliding direction. (B) Consecutive image profile of active and static particles. Left image: Raw image of video frame showing areas profiled for active (red) and static (blue) particles. Right graphs: Image profiles of active (red background) and static (blue background) particles every 330 ms for 1.98 s. (C) Consecutive image profiles showing particle movements every 330 ms for 1.98 s in 15.4 mM sodium azide. (D) Consecutive image profiles showing particle movements every 200 ms for 1.2 s without sodium azide (Movies S4). (B, C, D) Consecutive profiles of each frame from red to purple. Advancing (a) and returning (r) movements are presented. Peak positions of focusing particles are marked by a triangle and an arrow, respectively, for the initial and the end time points. Distances between peaks before and after movement are marked by a triangle and an arrow, respectively; these were manually measured for statistical analysis of particle movements. The profile of heights and positions is presented with a common X- Y- scale in the lower panel for each data set.

## Figure 5

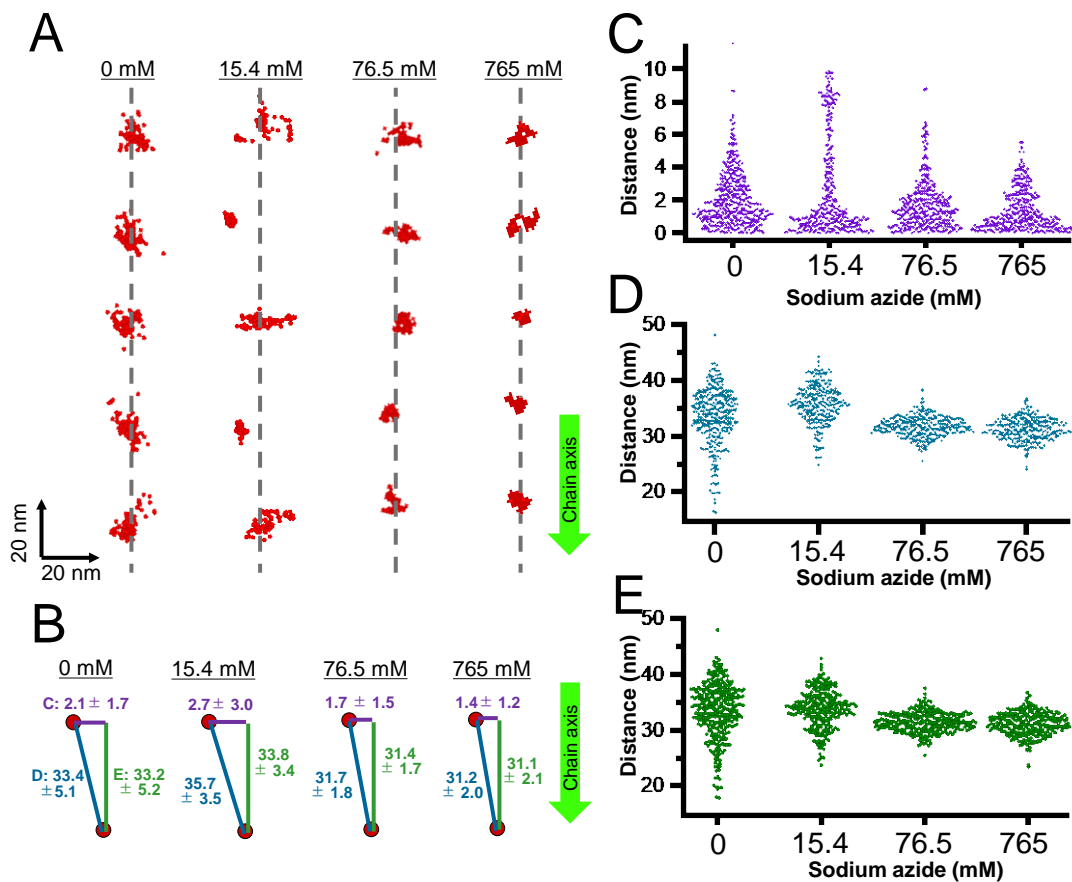

**FIG 5.** Analyses of particle distribution. (A) Distribution of particles in chain. The particle positions and the axis of the particle positions are indicated by red dots and grey dashed lines, respectively. The particle positions were detected every 200 and 330 ms, respectively, without and with sodium azide at 82, 66, 70, and 66 points under 0, 15.4, 76.5, and 765 mM sodium azide, respectively. The axis of particle positions was determined by a linear approximation of the average position of each particle. (B) Schematic illustration of three distances with average and standard deviation (SD) values in nm. The particle position to the chain axis (C, purple), the distance to the adjacent particle (D, blue), and the distance to the adjacent particle projected to the chain axis (E, green) are shown. Bar lengths are not to scale. Movies S4-7 were analyzed. The chain axis is indicated by a green arrow pointing mostly to the cell front in panels (A) and (B).

## Figure 6

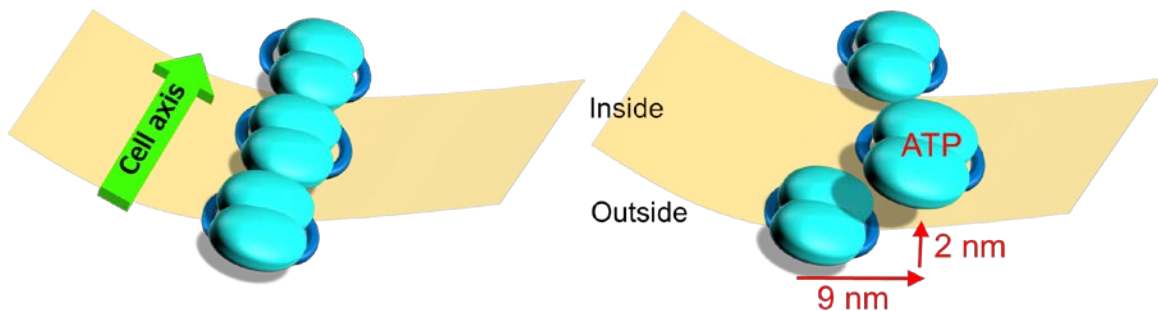

**FIG 6. Schematic illustration of particle movement in *M. mobile* visualized by HS-AFM.** The internal chain of the gliding machinery and cell membrane are indicated by blue objects and a beige plate, respectively. Here, we focus on the particle chain lining the lower side of cell membrane, while we scanned mostly the particle chain beneath the upper side of cell membrane in this study. The left and right panels show the particles before and after the advancing movement, respectively. The central particle moves as an ATP- or ADP/Pi-bound form, to the right and inner sides for a distance of 9 and 2 nm, respectively.
